# Supplementary material for: Benefits of Valsartan and Amlodipine in Lipolysis through PU.1 Inhibition in Fructose-Induced Adiposity
Source: MDPI journal article supplement (doi:10.3390/nu14183759), 2022-09-12

# Supplementary Materials

Figure S1. Experimental protocol for cell cultures.

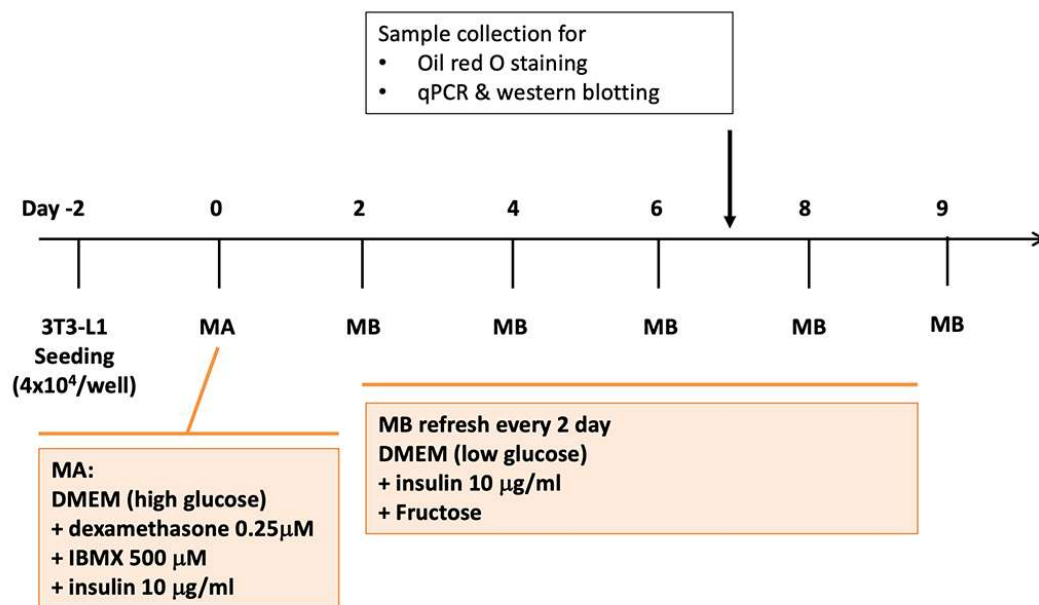

**Figure S2.** Effects PU.1 inhibitor, valsartan, and amlodipine on the protein levels of ATGL, SCD1 in adipocytes in vitro.

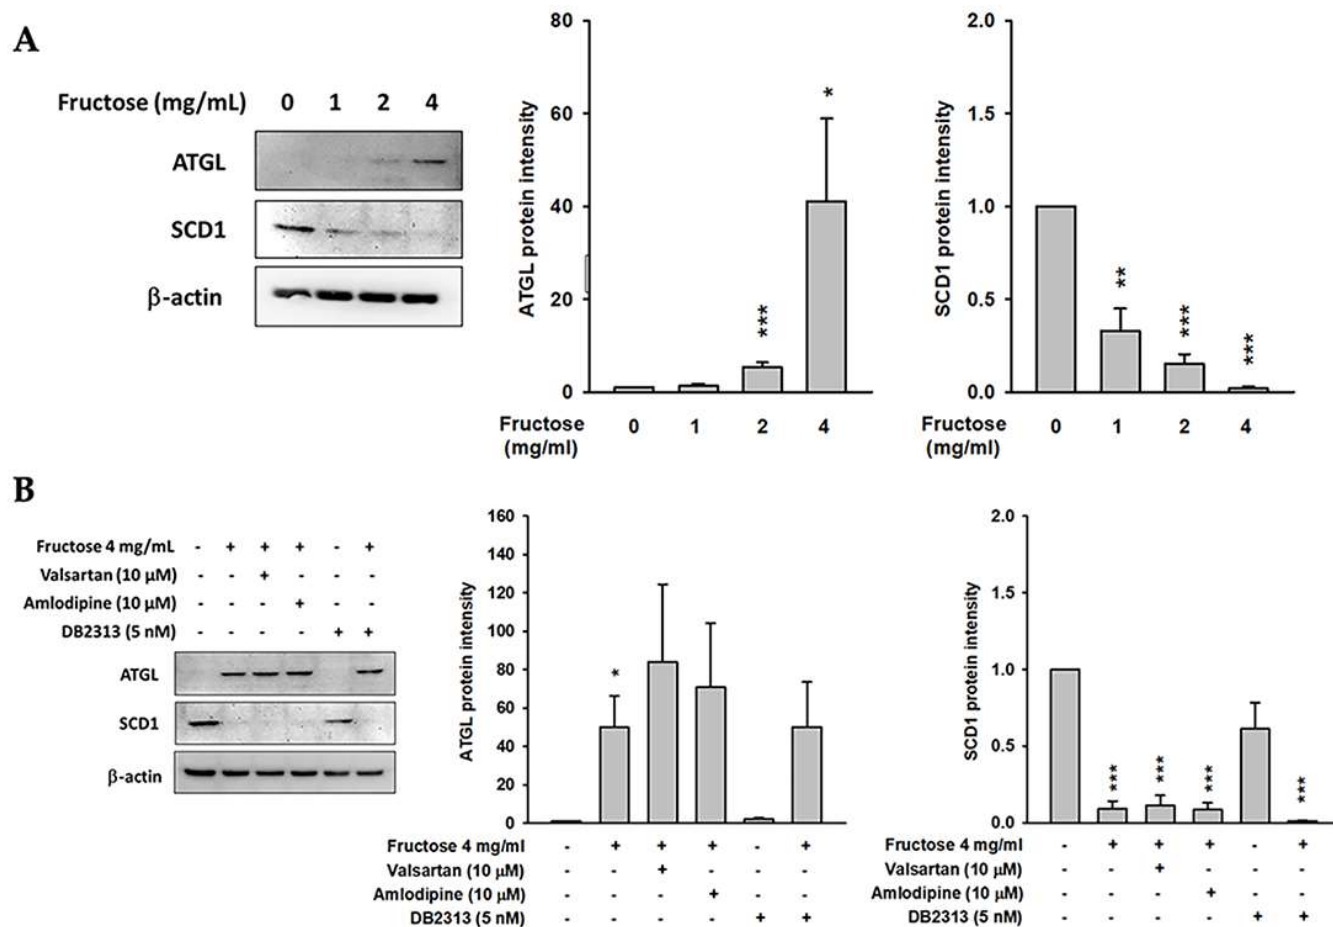

Supplement: s1 [file s1]
